# Supplementary material for: Crustose coralline algae increased framework and diversity on ancient coral reefs
Source: PubMed Central journal article supplement (PMC5544230; doi:10.1371/journal.pone.0181637), 2017-08-04

S1 Fig. Results of descriptive statistics for analysis of CCA contribution to reef dweller diversity

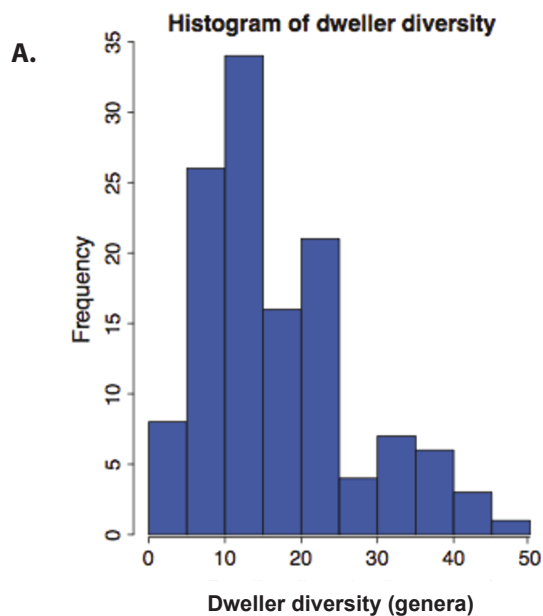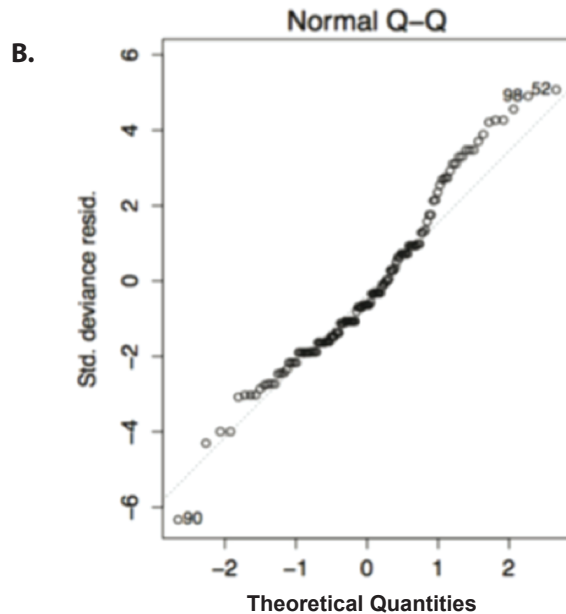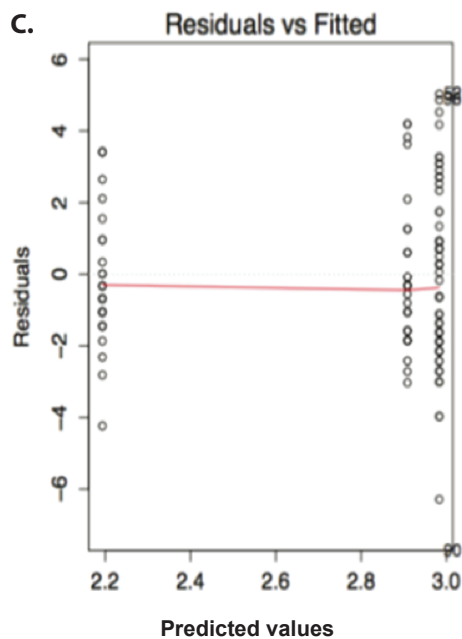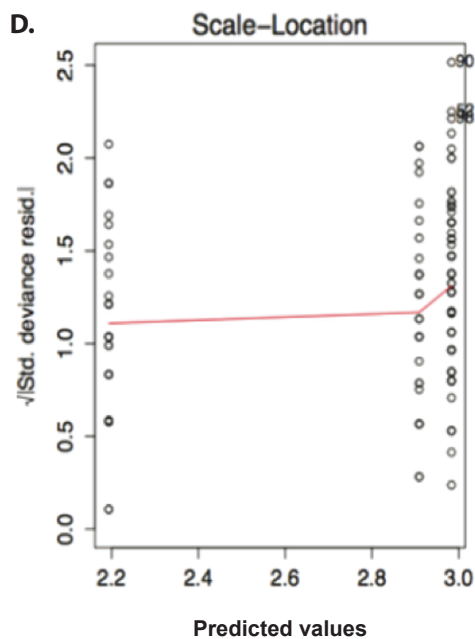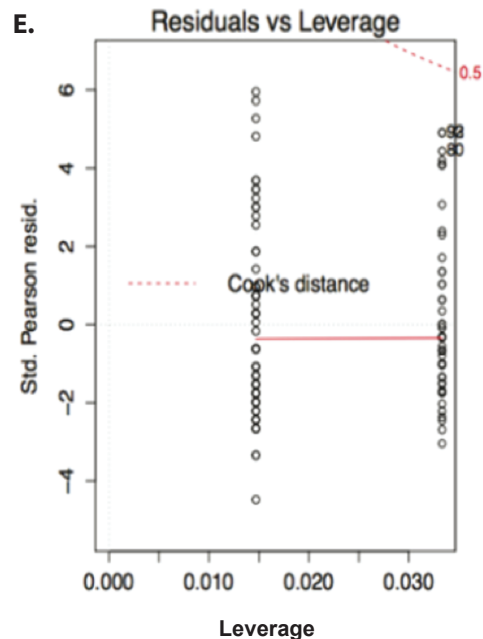

Supplement: pone.0181637.s007.pdf [file pone.0181637.s007.pdf]
