# Supplementary material for: Crustose coralline algae increased framework and diversity on ancient coral reefs
Source: PubMed Central journal article supplement (PMC5544230; doi:10.1371/journal.pone.0181637), 2017-08-04

S2 Fig. Results of descriptive statistics for analysis of CCA contribution to reef coral diversity

A. Histogram of Coral diversity

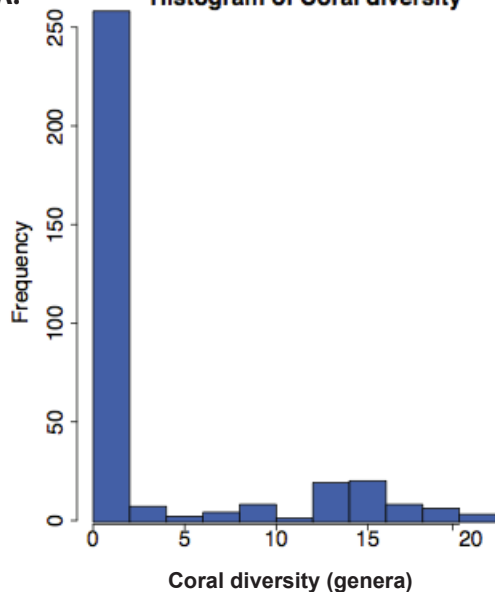

B. Normal Q-Q

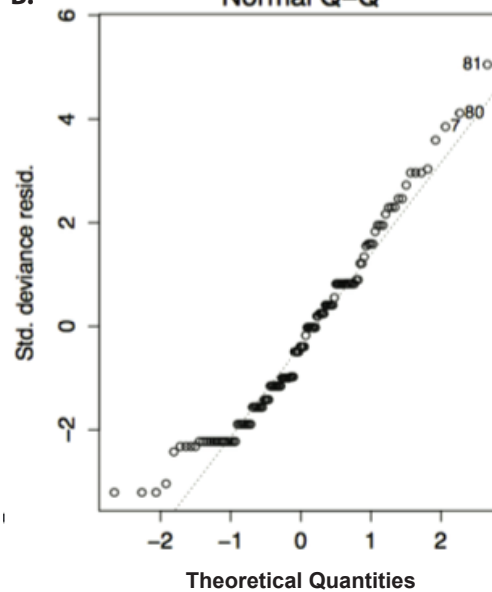

C. Residuals vs Fitted

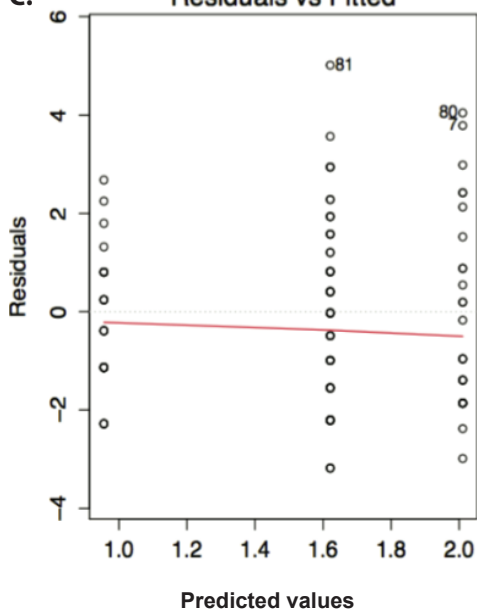

D. Scale-Location

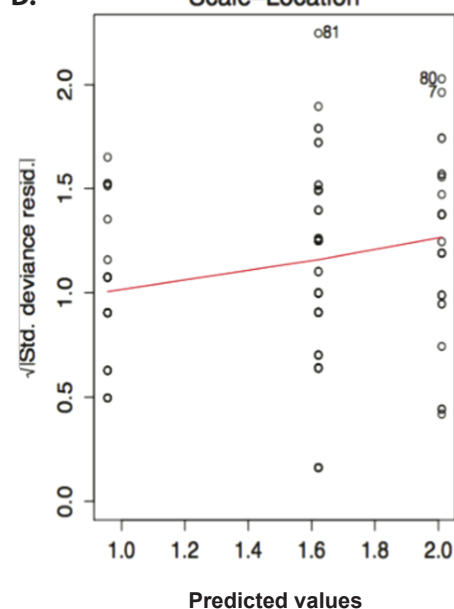

E. Residuals vs Leverage

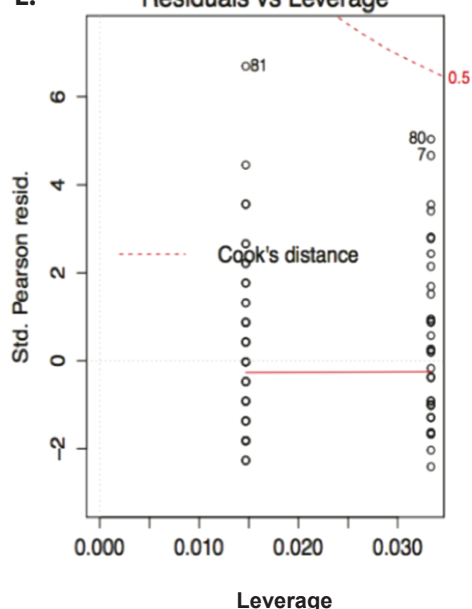

Supplement: pone.0181637.s008.pdf [file pone.0181637.s008.pdf]
